# Supplementary material for: 14-year hip survivorship after periacetabular osteotomy: a follow-up study on 1,385 hips
Source: PubMed Central journal article supplement (PMC8023930; doi:10.1080/17453674.2020.1731159), 2020-02-28
Supplement: IORT_A_1731159_SM3914.pdf [file IORT_A_1731159_SM3914.pdf]

## Supplementary data

Table 4. Studies reporting survival rates after periacetabular osteotomy

| Author (year)                  | Number of hips (patients) | THA            | Lost to follow-up hips (%) | Age at surgery mean (range) | Follow-up mean (range/SD) | Survival rate (%)                                           |
|--------------------------------|---------------------------|----------------|----------------------------|-----------------------------|---------------------------|-------------------------------------------------------------|
| Steppacher et al. (2008)       | 68 (58)                   | 26             | 5 (7)                      | 29 (13–56)                  | 20 (19–23)                | 5 years: 93<br>10 years: 87<br>15 years: 77<br>20 years: 60 |
| Matheney et al (2009)          | 135 (109)                 | 33             | 23 (17)                    | 27 (10–45)                  | 9 (2.2)                   | 5 years: 96<br>10 years: 84                                 |
| Troelsen et al. (2009)         | 116 (96)                  | 17             | 0 (0)                      | 30 (14–57)                  | 7 (5–9)                   | 5 years: 91<br>9 years: 82                                  |
| Hartig-Andreasen et al. (2012) | 401 (316)                 | 69             | 0 (0)                      | 34 (13–61)                  | 8 (4–12)                  | 12 years: 75                                                |
| Albers et al. (2013)           | 43 (42)                   | 3              | 4 (2)                      | 28 (13–44)                  | 11 (10–14)                | 5 years: 95<br>10 years: 90<br>5 years: 86<br>10 years: 78  |
|                                | 122 (105)                 | 16             |                            |                             |                           |                                                             |
| Dahl et al. (2014)             | 122 (89)                  | 11             | 5 (4)                      | 31 (13–49)                  | 7 (2.1)                   | 12 years: 85                                                |
| Beaulé et al. (2015)           | 72 (67)                   | 1              | 2 (3)                      | 32 (14–54)                  | 5 (1–8.3)                 | 5 years: 94<br>8 years: 86                                  |
| Grammatopoulos et al. (2016)   | 68 (57)                   | 4 <sup>a</sup> | 2 (3)                      | 25 (15–41)                  | 8 (2–18)                  | 10 years: 93                                                |
| Lerch et al. (2017)            | 75 (63)                   | 42             | 6 (8) <sup>b</sup>         | 29 (13–56)                  | 29 (27–32)                | 30 years: 29                                                |
| Ziran et al. (2018)            | 302 (258)                 | 54             | 176 (41) <sup>c</sup>      | 33 (13–63)                  | 11 (2–27)                 | 10 years: 86<br>20 years: 60                                |
| Wells et al. (2018a)           | 154 (129)                 | 8              | 22 (14)                    | 26 (10–60)                  | 10 (4–20)                 | 5 years: 97<br>10 years: 95<br>15 years: 92                 |
| Isaksen et al. (2018)          | 69 (59)                   | 9              | 3 (5) <sup>c</sup>         | 32 (14–44)                  | 7.4 (2–15)                | 8 years: 84                                                 |
| Current study                  | 1,385 (1,126)             | 73             | 0 (0)                      | 32 (13–59)                  | 5.4 (0.03–14)             | 5 years: 96<br>10 years: 90<br>14 years: 80                 |

<sup>a</sup> THA and hip resurfacing.  
<sup>b</sup> Questionnaire only.  
<sup>c</sup> Calculated on number of patients
